# Supplementary material
Source: PubMed Central journal article supplement (PMC8993821)

Original images for Blots, Related to Figure 1A

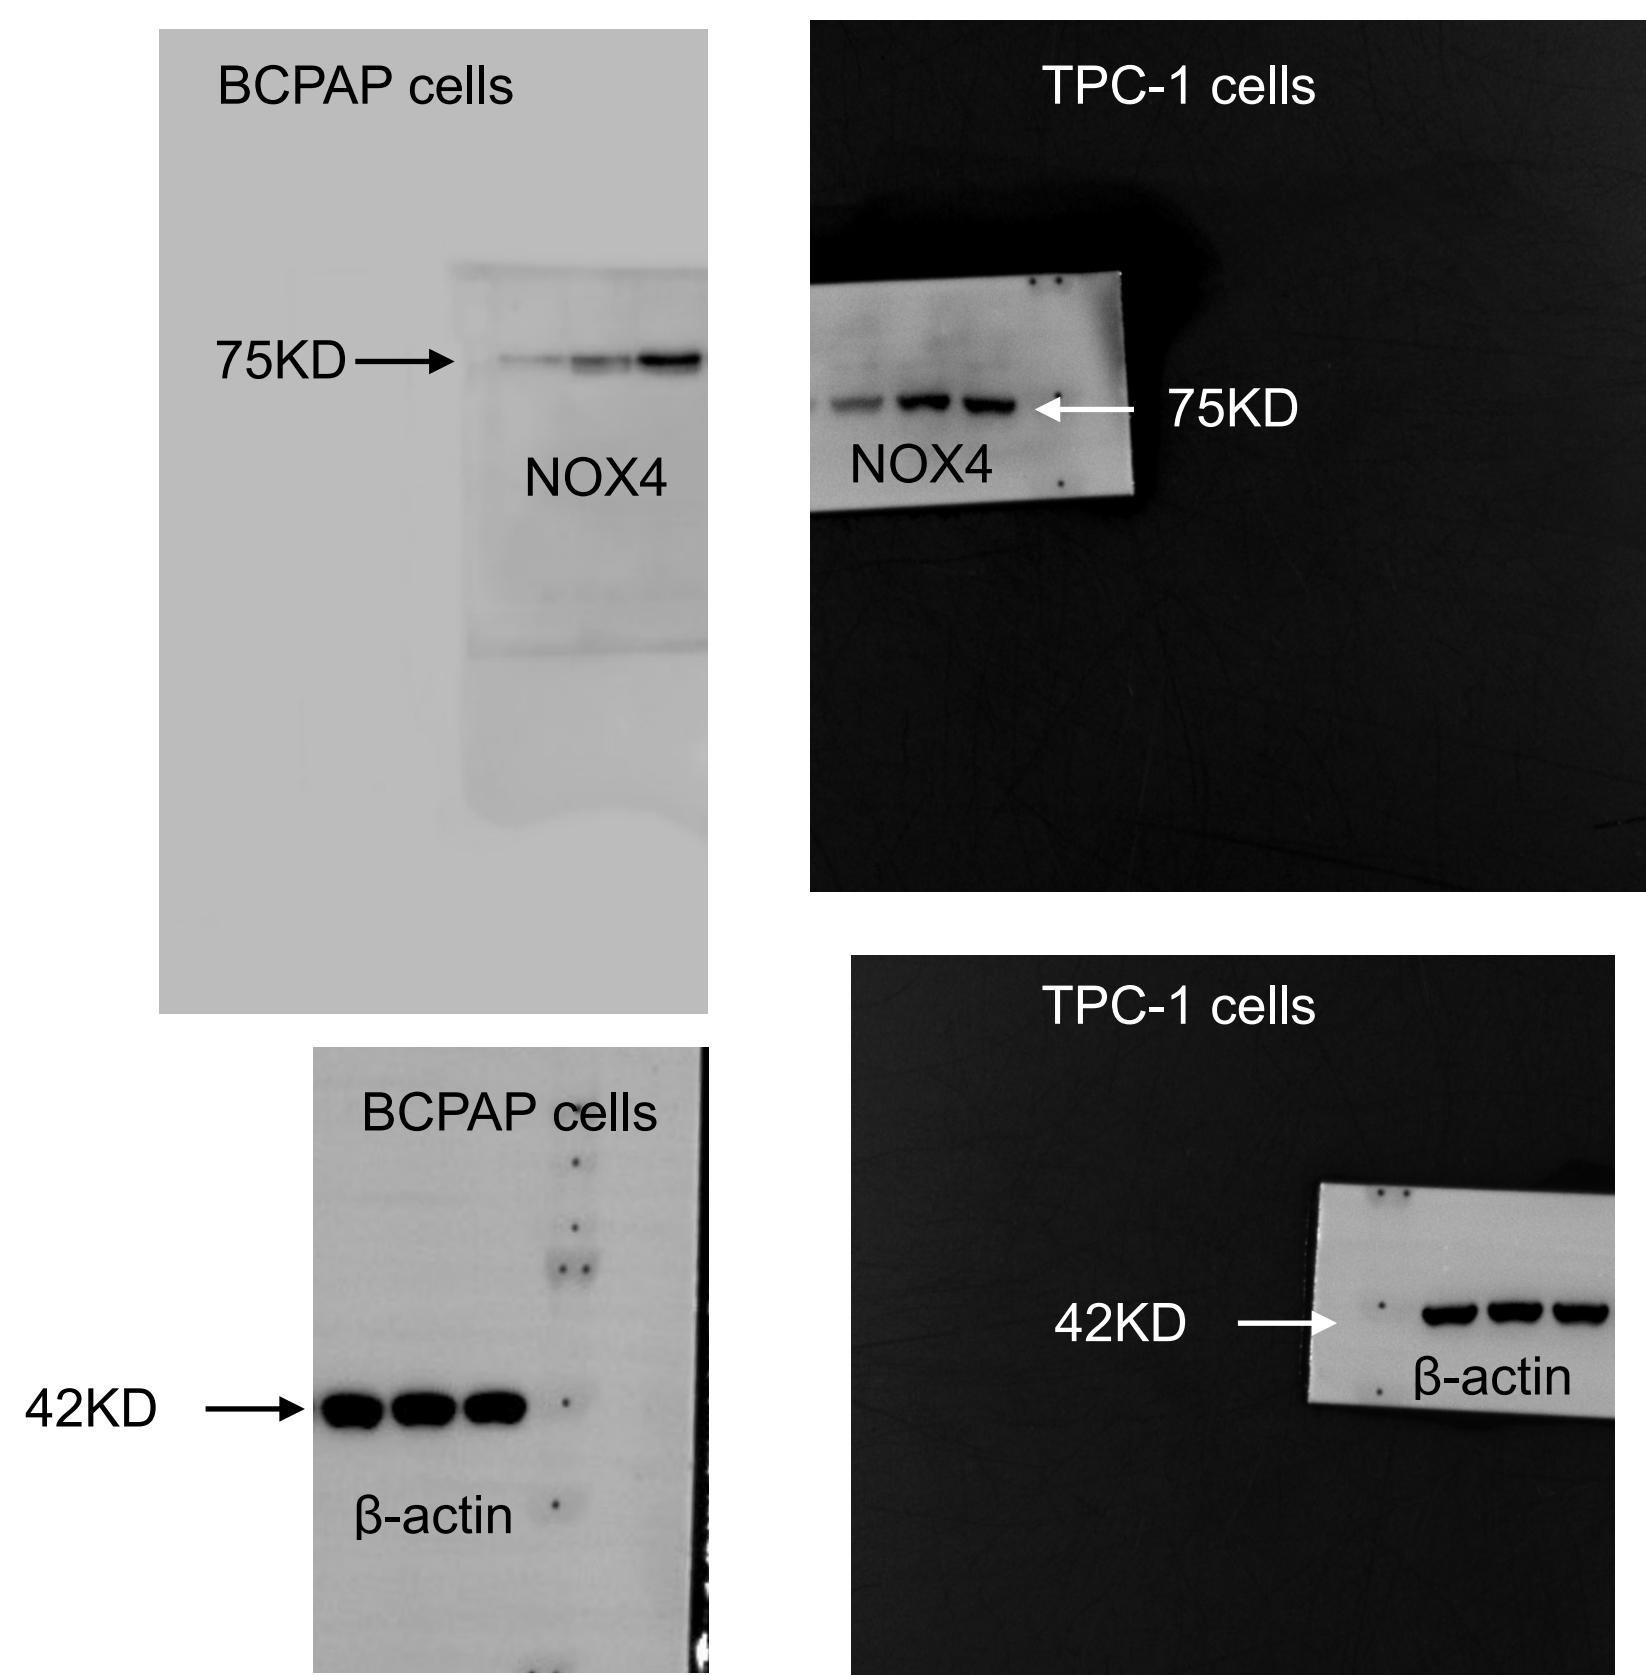

Original images for Blots, Related to Figure 6A

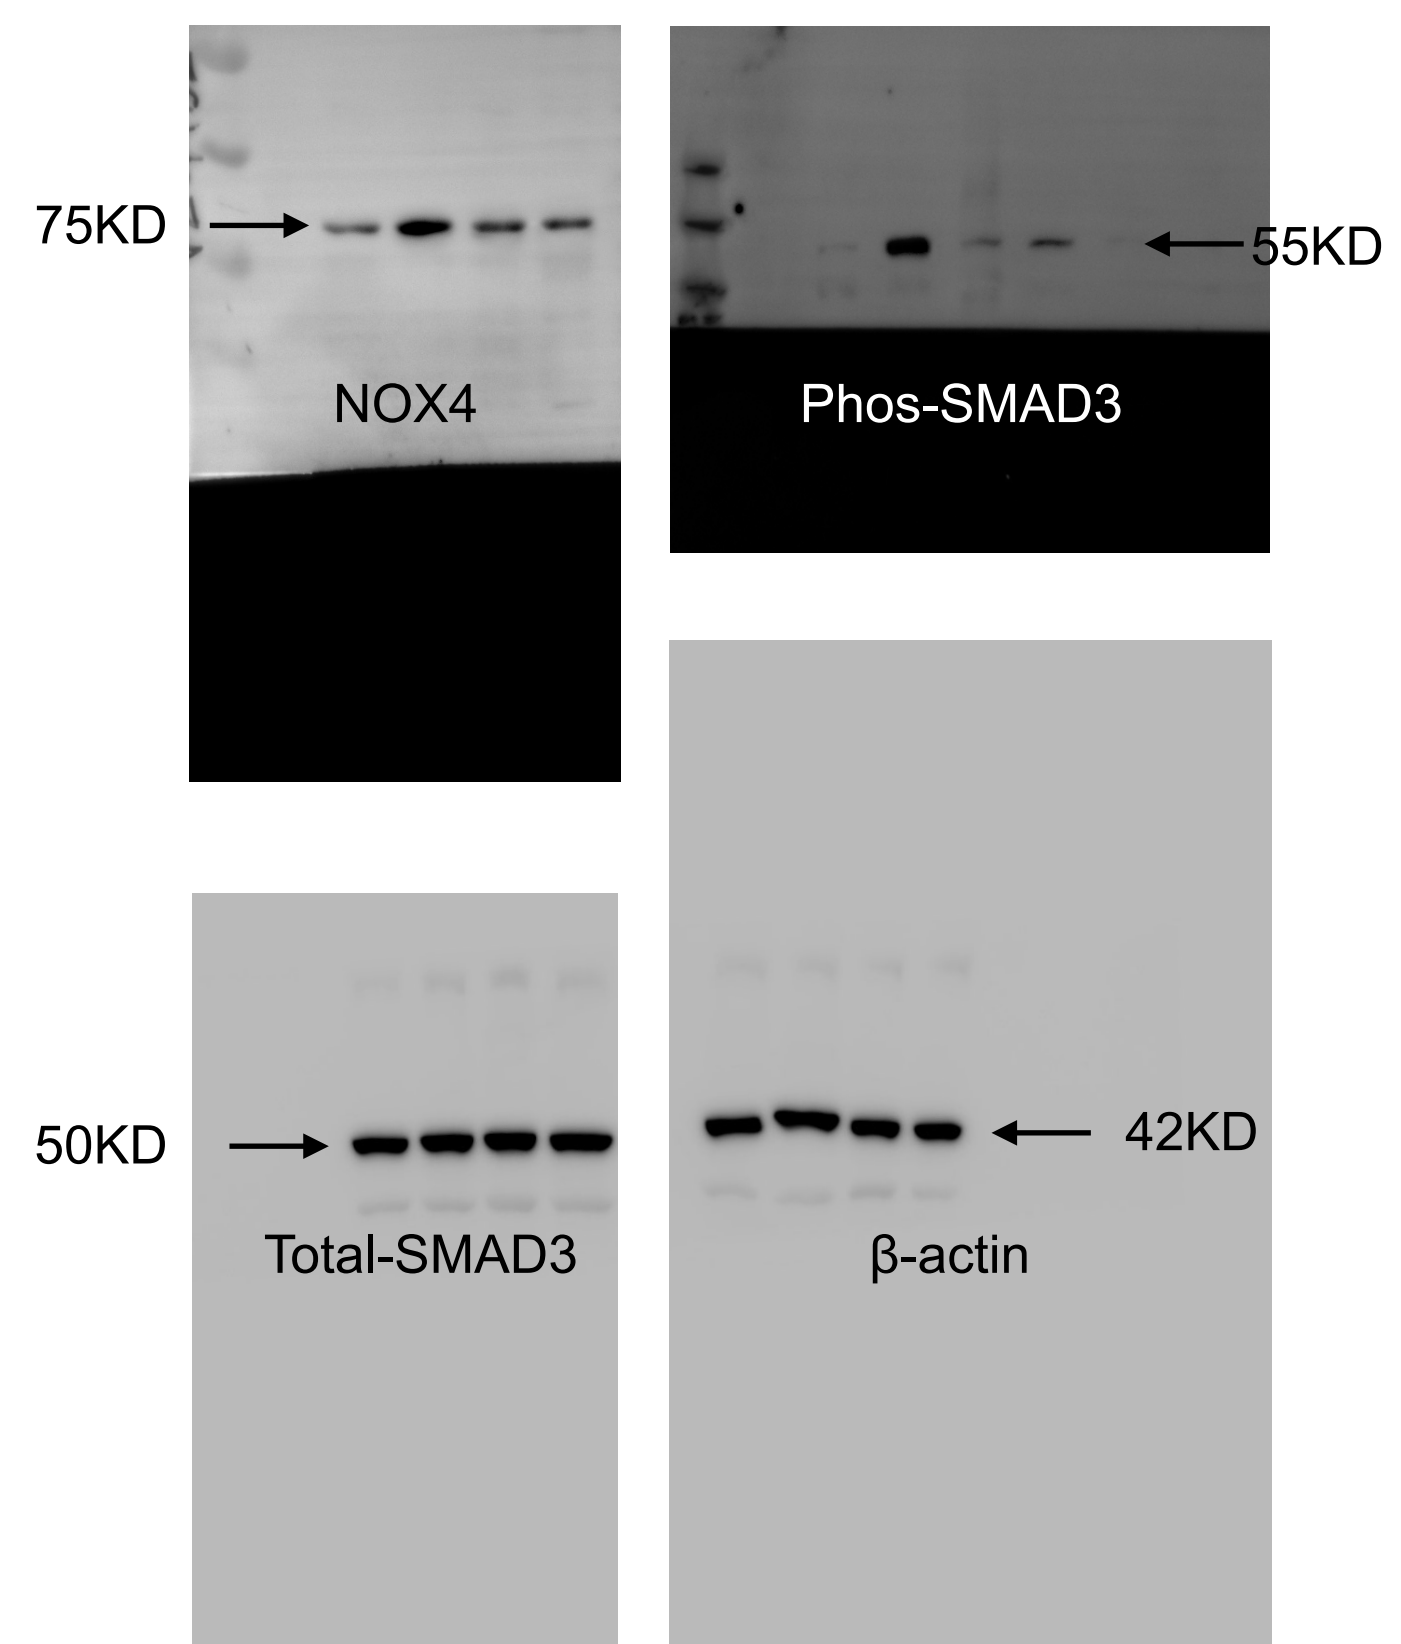

Original images for Blots, Related to Figure 6B

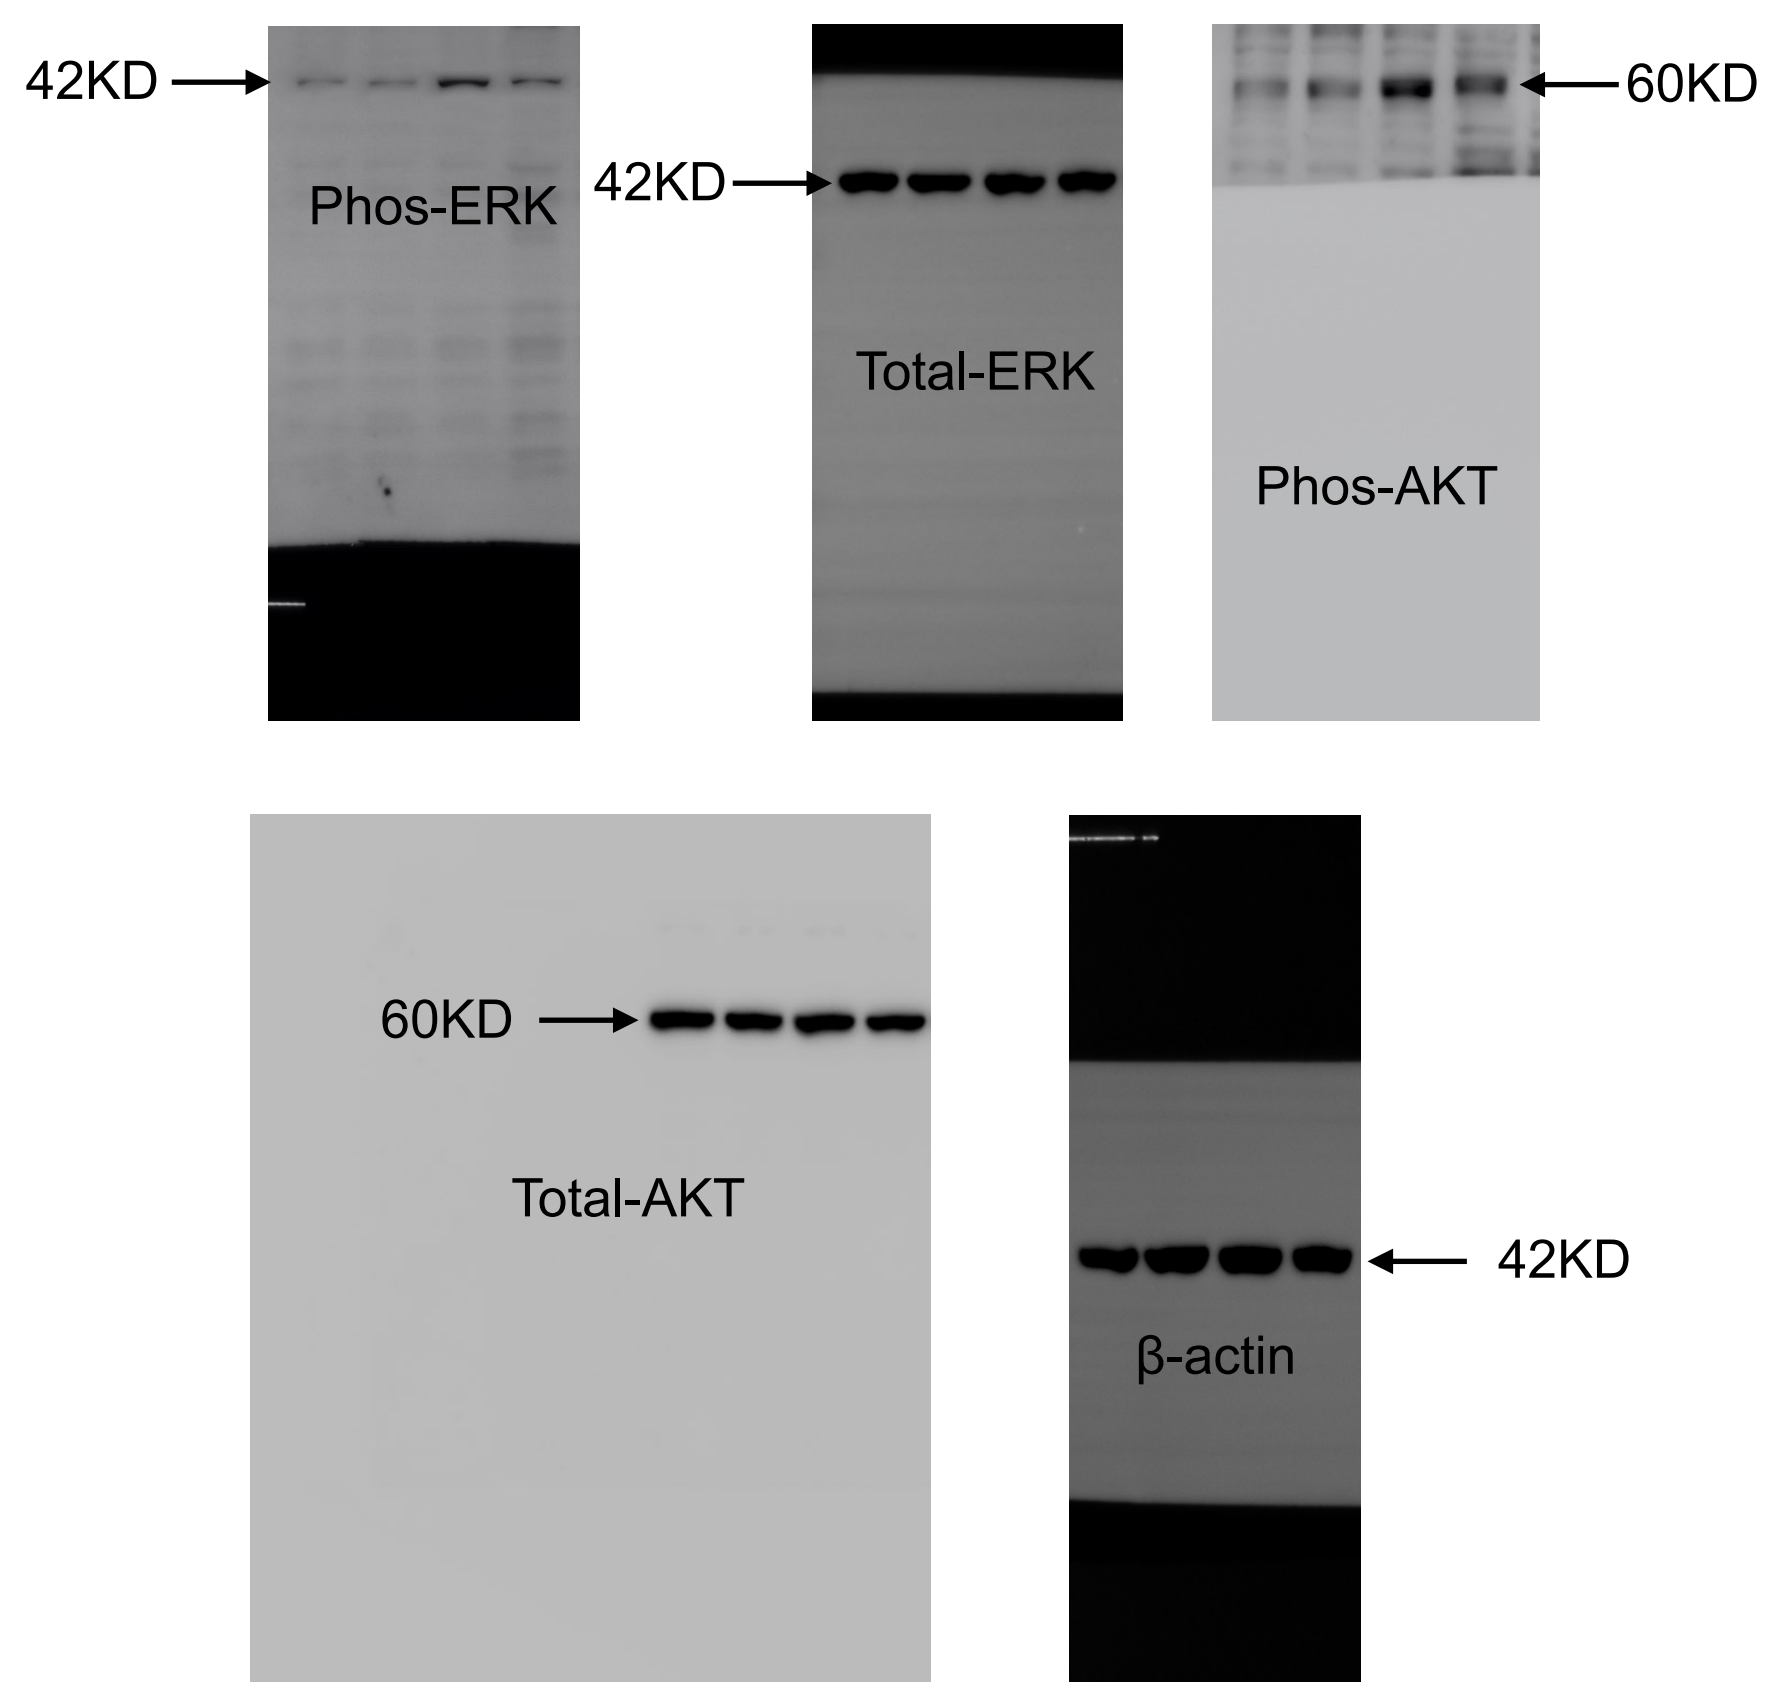

Original images for Blots, Related to Figure 6F

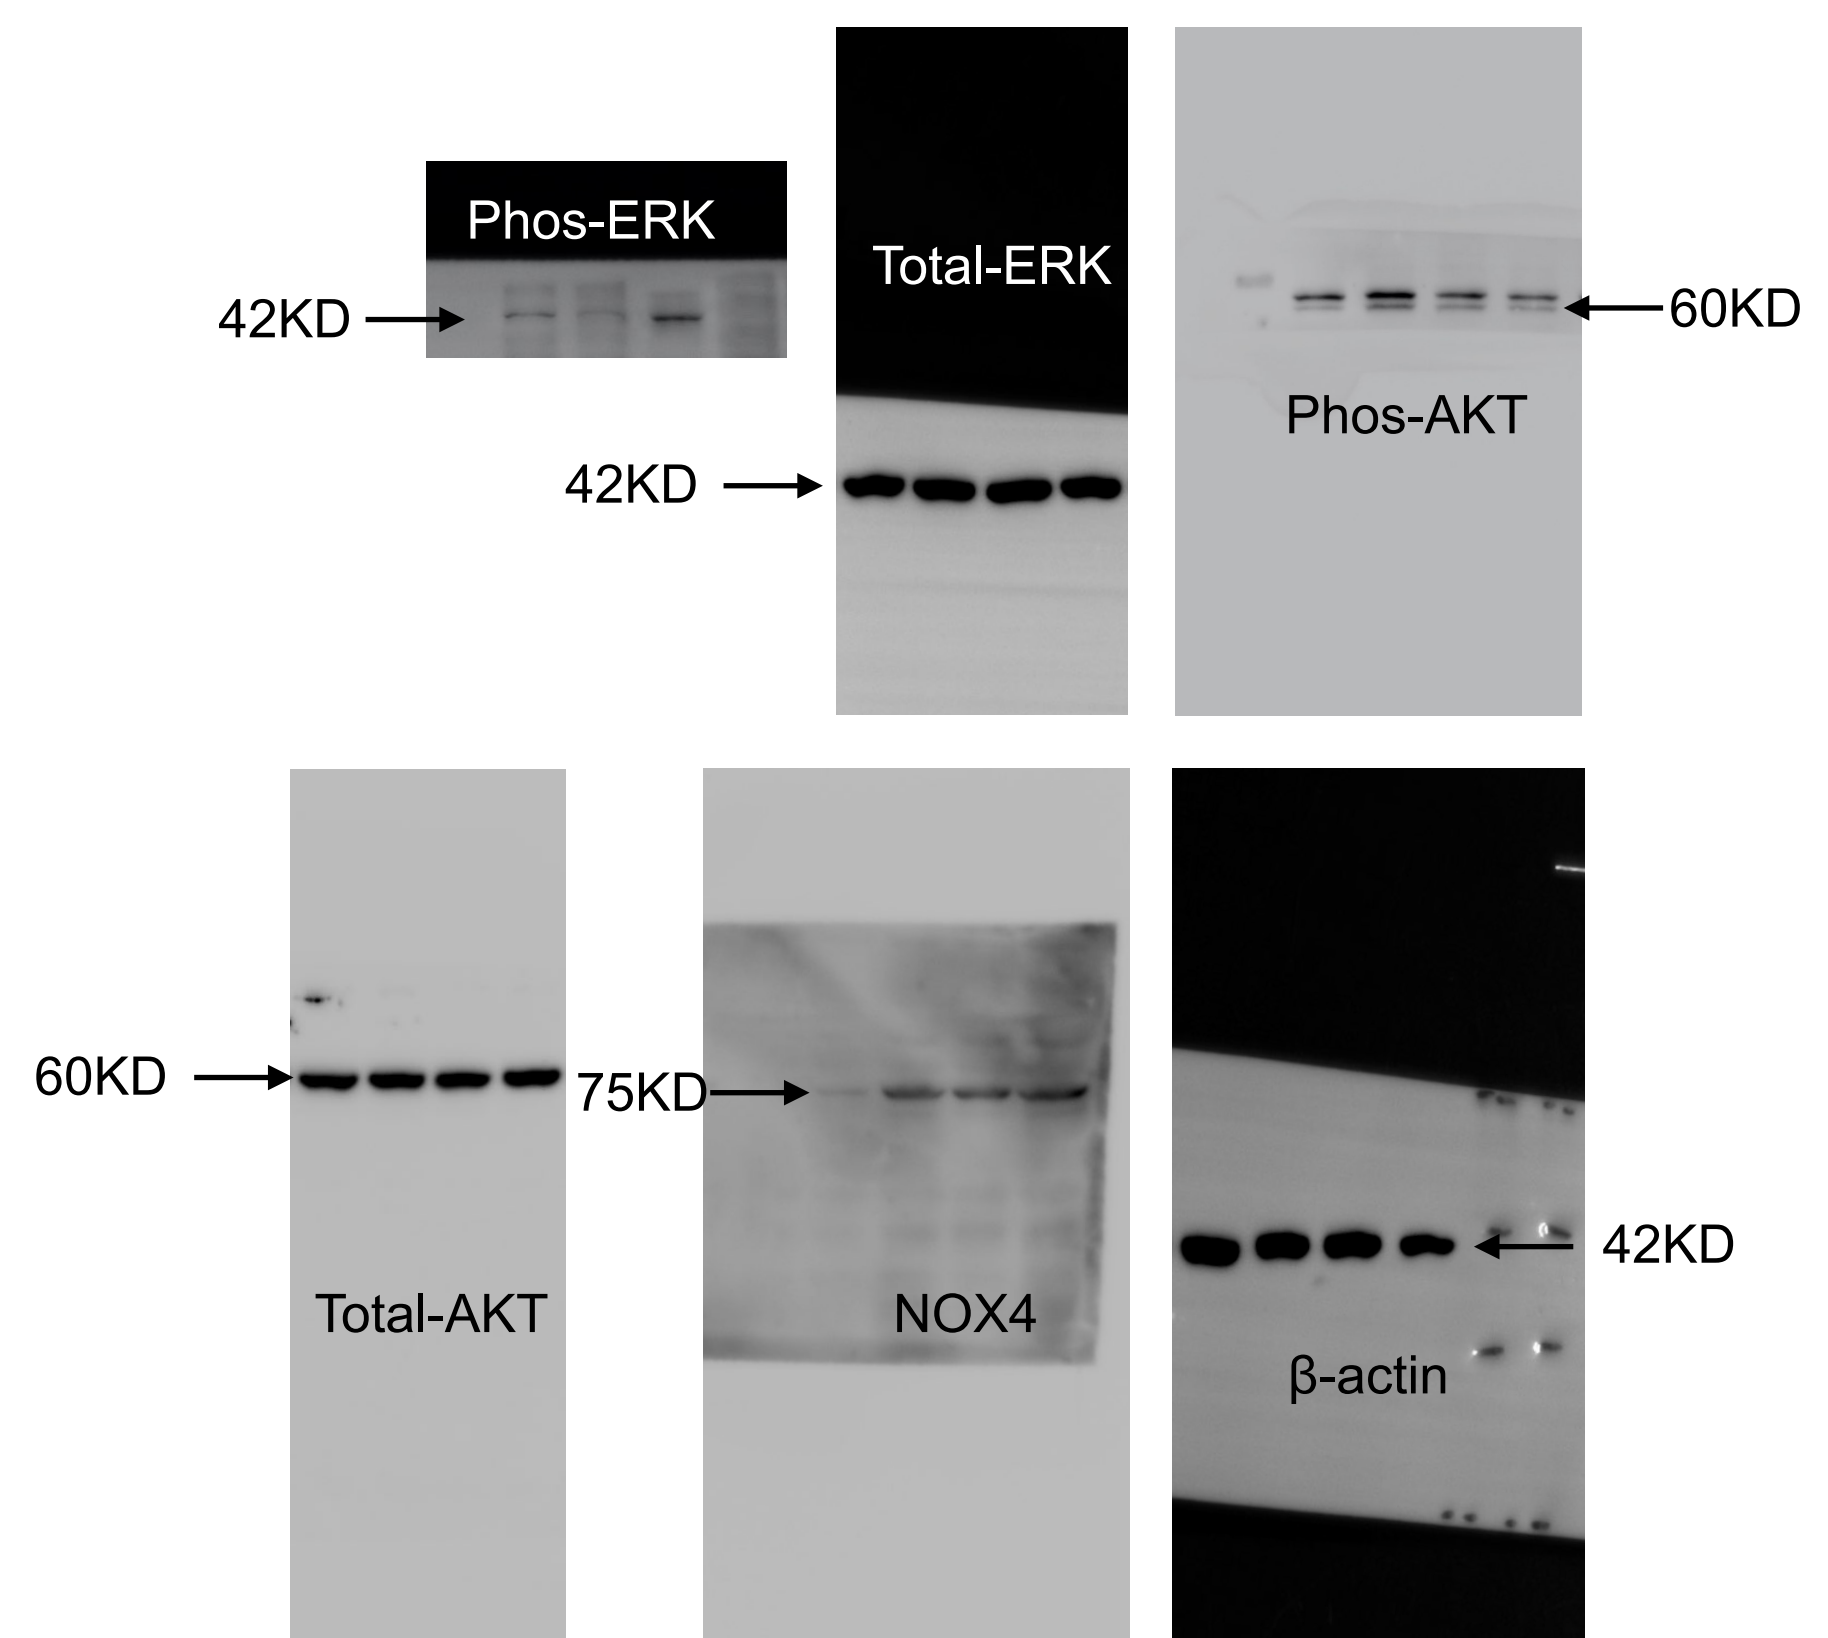

Original images for Blots, Related to Supplementary Figure 1A

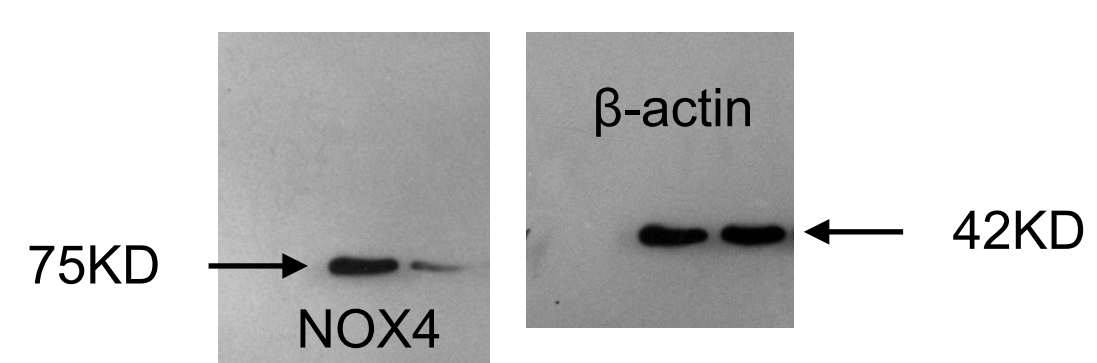

Original images for Blots, Related to Supplementary Figure 3B

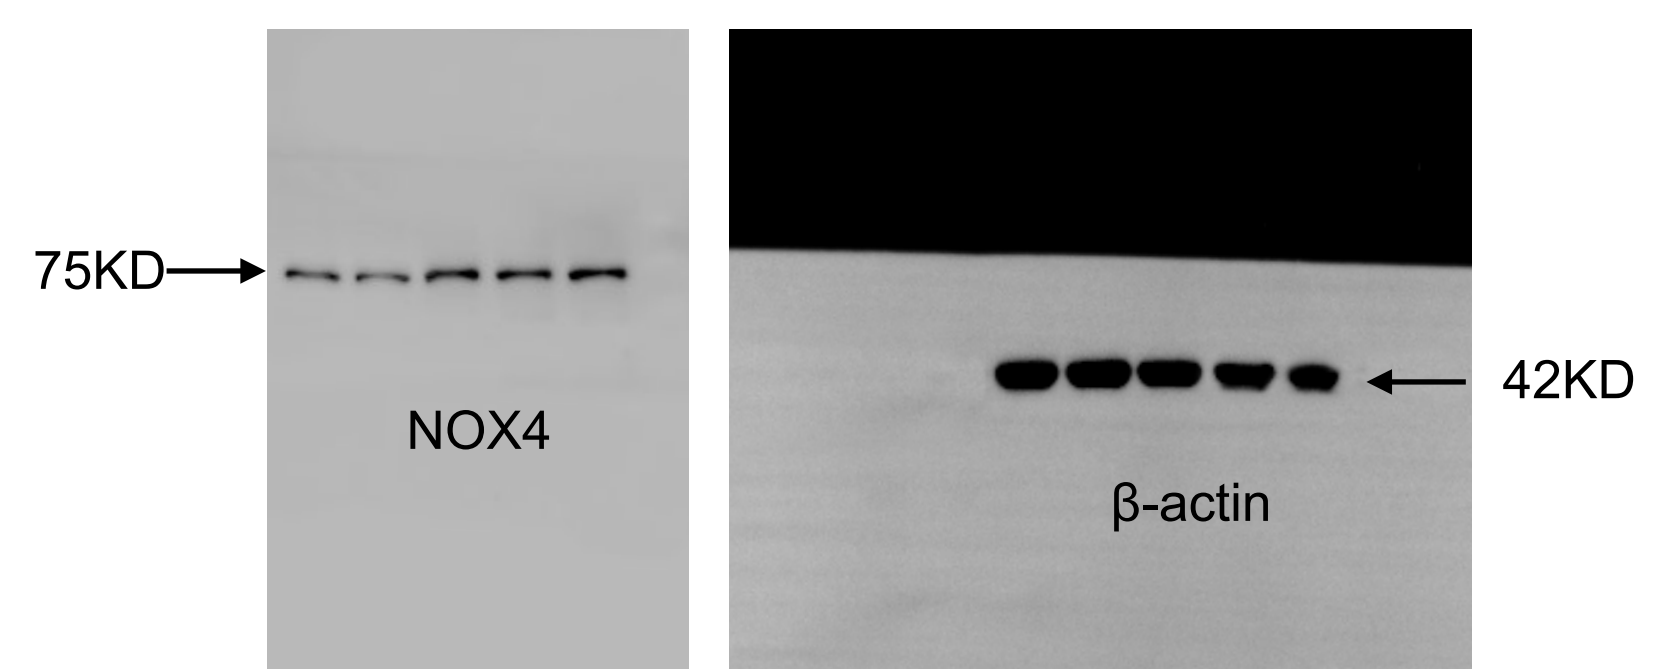

Original images for Blots, Related to Supplementary Figure 4B

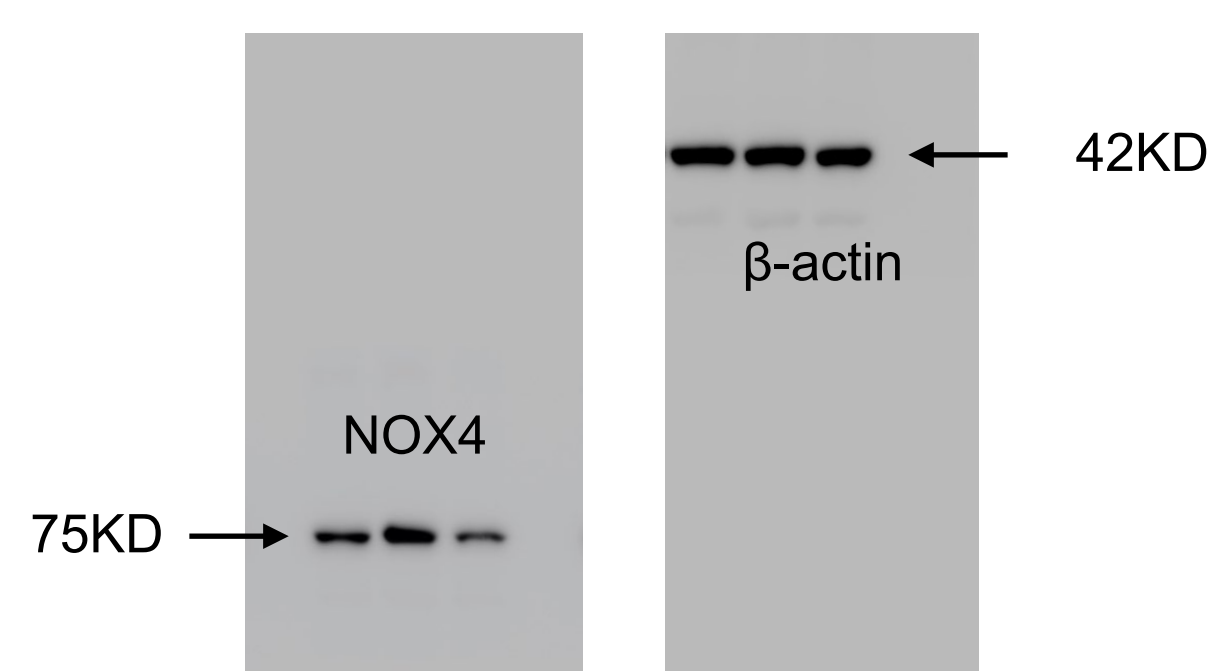

Supplement: 41420_2022_994_MOESM2_ESM.pdf [file 41420_2022_994_MOESM2_ESM.pdf]
